# Supplementary material for: Inkjet-Printed Silver Nanowire Ink for Flexible Transparent Conductive Film Applications
Source: MDPI journal article supplement (doi:10.3390/nano12050842), 2022-03-02
Supplement: s1 [file s1]

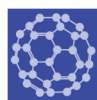

# Inkjet-Printed Silver Nanowire Ink for Flexible Transparent Conductive Film Applications

Shuyue Wang <sup>1,†</sup>, Xiaoli Wu <sup>1,2,†</sup>, Jiaxin Lu <sup>1</sup>, Zhengwu Luo <sup>1</sup>, Hui Xie <sup>1</sup>, Xiaobin Zhang <sup>1</sup>, Kaiwen Lin, <sup>1,\*</sup> and Yuehui Wang <sup>1,\*</sup>

<sup>1</sup> Zhongshan Institute, University of Electronic Science and Technology of China, Guangdong, Zhongshan 528402, China; shuyewang125@163.com (S.W.); 201921030315@std.uestc.edu.cn (X.W.); JIAC13509809967@163.com (J.L.); luozhengwu128@163.com (Z.L.); Xiehuizsedu@126.com (H.X.); zhangxiaobin@redsolar.com.cn (X.Z.)

<sup>2</sup> Department of Material and Energy, University of Electronic Science and Technology of China, Chengdu 610054, China

\* Correspondence: wyh@zsc.edu.cn (Y.W.); 201610102331@mail.scut.edu.cn (K.L.); Tel.: +86-760-8832-5402

† These authors contributed equally to this work.

**Citation:** Wang, S.; Wu, X.; Lu, J.; Luo, Z.; Xie, H.; Zhang, X.; Lin, K.; Wang, Y. Fabrication of Inkjet Printability Silver Nanowires Ink with High Concentration and Its Application in Flexible Transparent Pattern Circuit. *Nanomaterials* **2022**, *12*, 842. <https://doi.org/10.3390/nano12050842>

Academic Editor(s): Christian Falconi and Andrew Pike

Received: 13 December 2021

Accepted: 23 February 2022

Published: 2 March 2022

**Publisher's Note:** MDPI stays neutral with regard to jurisdictional claims in published maps and institutional affiliations.

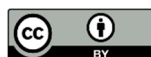

**Copyright:** © 2022 by the authors. Submitted for possible open access publication under the terms and conditions of the Creative Commons Attribution (CC BY) license (<https://creativecommons.org/licenses/by/4.0/>).

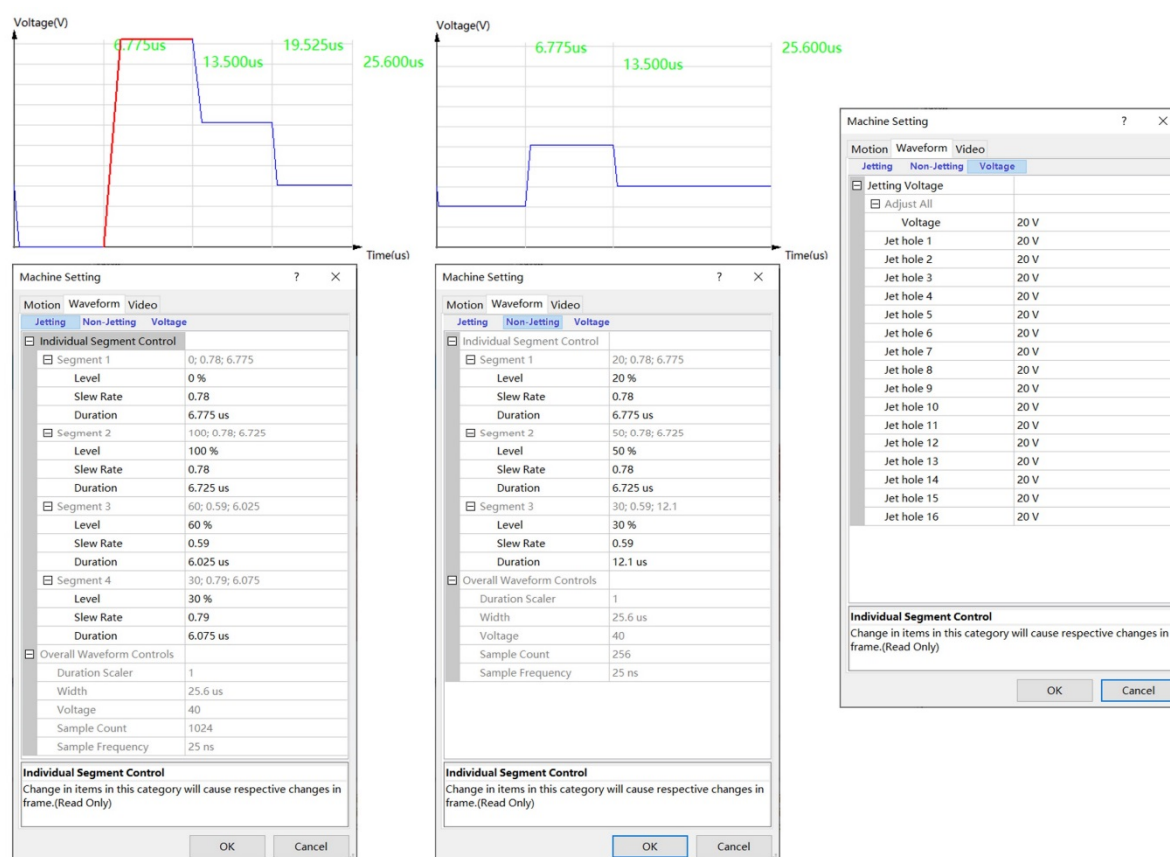

Figure S1. Jetting waveform parameters and voltage.

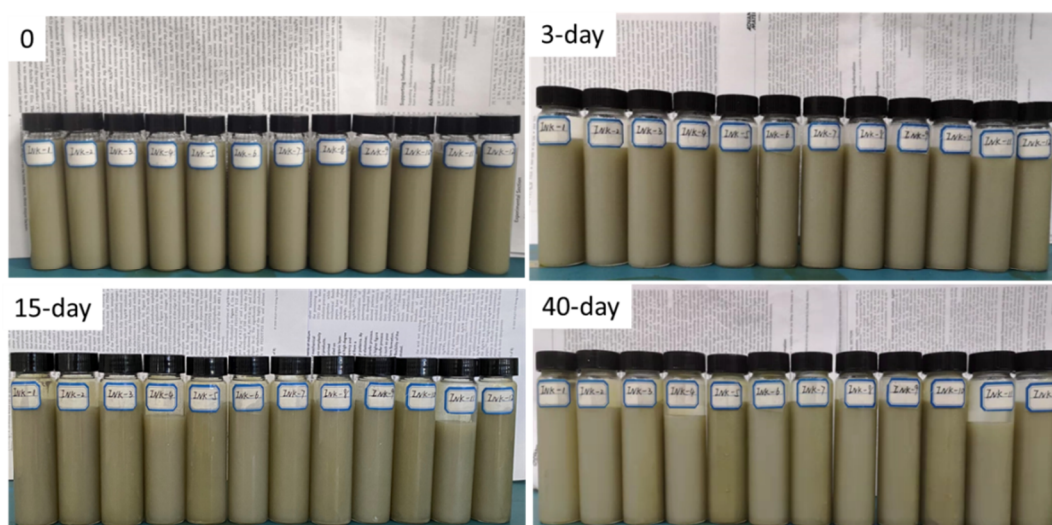

**Figure S2.** Photographs of the as-prepared AgNWs inks in Table 1 placed in the refrigerator (8°C) for 0, 3, 15 and 40 days, respectively.

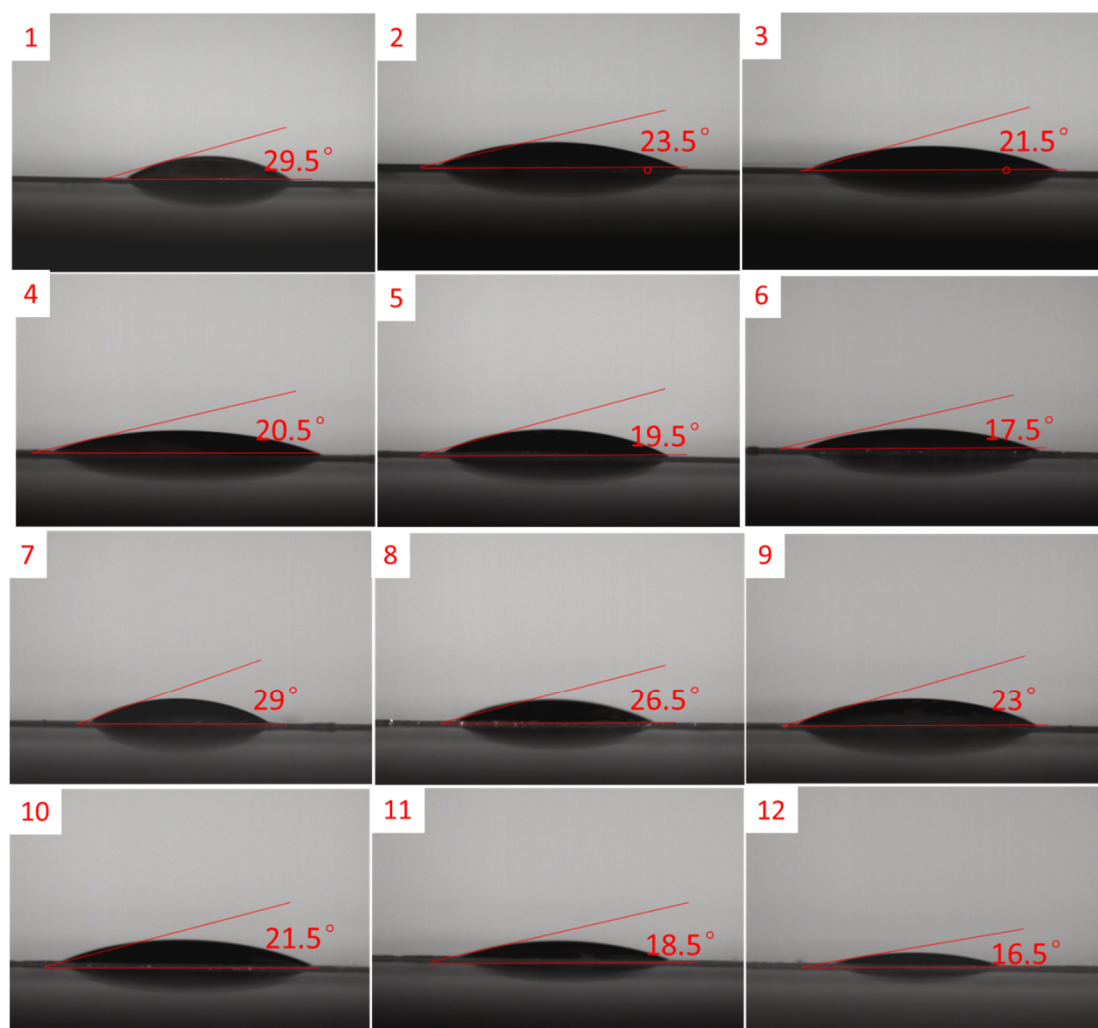

**Figure S3.** Photographs of Contact Angle of AgNWs inks shown in Table 1.

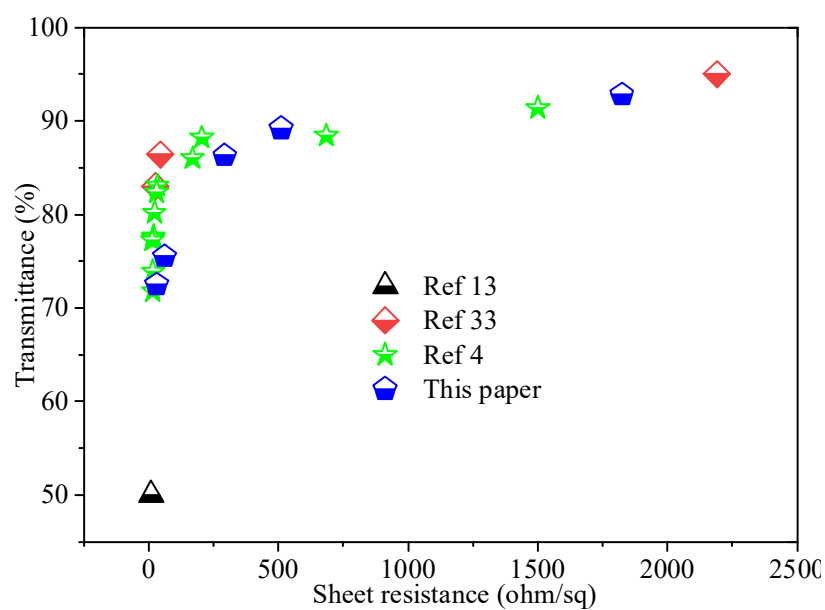

**Figure S4.** Relationship between sheet resistance and transmittance of inkjet printed silver nanowires flexible transparent conductive film in different literatures.

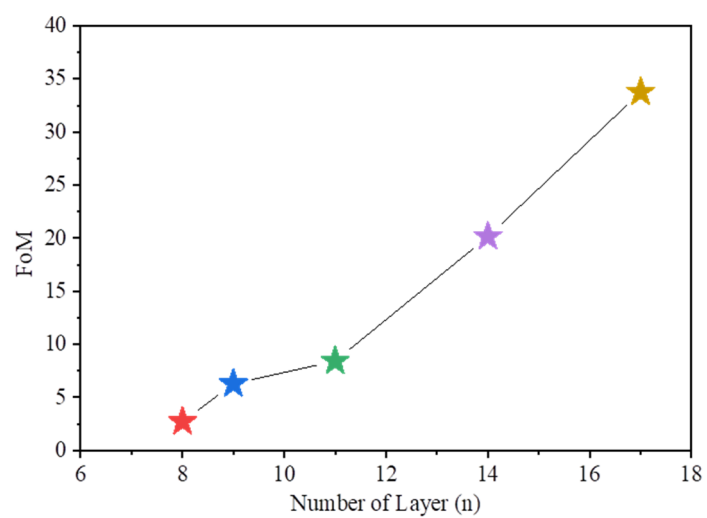

**Figure S5.** FOM of AgNWs films with different printing layers.
